# Supplementary material for: Understanding the impact of tuberous sclerosis complex: development and validation of the TSC-PROM
Source: Springer Nature journal article supplement (doi:10.1186/s12916-023-03012-4), 2023-08-08
Supplement: MOESM2 [file 25900140]

## **TSC-PROM**

### **Questionnaire for adults with Tuberous Sclerosis Complex (TSC)**

## **Explanation and instructions**

### **What is this questionnaire about?**

You are filling in this questionnaire because you have Tuberous Sclerosis Complex. This questionnaire is about the complaints and limitations you experience.

The questionnaire consists of the following domains:

- Baseline information
- Physical functions
- Mental functions
- Activities and participation
- Social support
- Quality of life

### **How to fill in this questionnaire?**

Read the instructions with every section carefully.

Choose the answer that is most appropriate. Don't worry if some questions appear not to apply to you. We have to ask the same questions to everybody.

### **Explanation and examples**

Some questions contain a short explanation. This explains the meaning of the mentioned term.

If f.e. (for example) is used, one or more examples follow. Possibly these examples are not applicable to you, but they may help you understand the question better.

### **Time**

Filling in the questionnaire will take approximately 20 min.

**Baseline information**

**1. What is your sex?**

- Male
- Female
- Other

**2. What is your age?**

\_\_\_\_\_years

**3. What is your nationality?**

- American
- Other (please specify): \_\_\_\_\_

**4. At what age were you diagnosed with TSC?**

\_\_\_\_\_years

**5. (a) Has genetic testing been performed?**

- I don't know (go to question 6)
- No (go to question 6)
- Yes

**(b) What were the results?**

- I don't know
- TSC1 mutation
- TSC2 mutation
- No mutation identified
- Mutations found but uncertain if they cause TSC

**6. Which organs show, or have shown, symptoms of TSC? For example: tubers, tumors, pigment changes**

- |                                              |                                  |
|----------------------------------------------|----------------------------------|
| <input type="checkbox"/> None                | <input type="checkbox"/> Brain   |
| <input type="checkbox"/> Skin                | <input type="checkbox"/> Kidneys |
| <input type="checkbox"/> Lungs               | <input type="checkbox"/> Eyes    |
| <input type="checkbox"/> Heart               | <input type="checkbox"/> Mouth   |
| <input type="checkbox"/> Other, namely _____ |                                  |

**7. Do you use medication?**

- No
- Yes (please list all the medication you use) \_\_\_\_\_  
\_\_\_\_\_  
\_\_\_\_\_

**8. (a) Do you have epilepsy, now or in the past?**

- No (go to question 9)
- Yes

**(b) At what age did you have your first seizure?**

\_\_\_ years and \_\_\_ months

- I don't know

**(c) How often do you have seizures?**

- Daily, approximately \_\_\_ per day
- Weekly, approximately \_\_\_ per week
- Monthly, approximately \_\_\_ per month
- I am seizure free, since \_\_\_ years old

**(d) Do you have a vagal nerve stimulator**

- No
- Yes

**(e) Are you on a ketogenic diet?**

- No
- Yes

**9. What is your level of intellectual functioning**

- Normal intellectual ability
- Normal intellectual ability with specific learning disability (dyscalculia, dyslexia)
- Mild or moderate intellectual disability
- I don't know

**10. What was your last measured IQ or developmental age (if known)?**

- My IQ was \_\_\_ measured on \_\_\_\_\_ (date or year)
- My developmental age was (approximately) \_\_\_\_\_ measured on \_\_\_\_\_ (date or year)
- I don't know

**11. What is the highest level of education that you have completed?**

- None
- Preschool/kindergarten
- Primary education
- Primary education, special education program
- Lower secondary education (Middle school or Junior High)
- Secondary education, special education program
- Upper to post-secondary (Senior High school, 1-year certificate programs)
- Academic higher education or doctoral (Bachelor, Master, PhD)

**12. What is your current living situation?**

- I live alone, without assistance
- I live with other people, without assistance
- I live alone with ambulatory professional support
- I live with other people and with ambulatory professional support
- I live in an assisted living facility for people with a disability (no 24 hour care)
- I live in an assisted living facility for people with a disability (with 24 hour care)

**13. Have you ever been diagnosed with any of the following?**

|                                                           | <b>No</b>                | <b>Yes</b>               | <b>I don't know</b>      |
|-----------------------------------------------------------|--------------------------|--------------------------|--------------------------|
| Autism spectrum disorder (Autism, ASS, PDD-NOS, Asperger) | <input type="checkbox"/> | <input type="checkbox"/> | <input type="checkbox"/> |
| Attention deficit hyperactivity disorder (ADD, ADHD)      | <input type="checkbox"/> | <input type="checkbox"/> | <input type="checkbox"/> |
| Obsessive compulsive disorder (OCD)                       | <input type="checkbox"/> | <input type="checkbox"/> | <input type="checkbox"/> |
| Anxiety disorder                                          | <input type="checkbox"/> | <input type="checkbox"/> | <input type="checkbox"/> |
| Depressive disorder                                       | <input type="checkbox"/> | <input type="checkbox"/> | <input type="checkbox"/> |
| Psychotic disorder (f.e. schizophrenia)                   | <input type="checkbox"/> | <input type="checkbox"/> | <input type="checkbox"/> |
| Other diagnoses, namely .....                             |                          |                          |                          |

**14. (a) Do you have any other health concerns besides your TSC?**

- No (go to question 15)
- Yes

**(b) What are these health concerns?**

- High blood pressure (hypertension)
- Diabetes ('sugar')
- Thyroid problems
- Malignant tumor (cancer)
- Other (please specify): .....

**15. (a) In the past year, have you experienced any major life events?**

- No (go to the next section)
- Yes

**(b) What kind of life events?**

- Moving house
- Change of employment / daytime occupation
- Severe illness or death of a family member or friend
- Another major life event, namely .....

**Physical functions**

In general, how would you rate your overall health? Please put a mark on the ruler below.

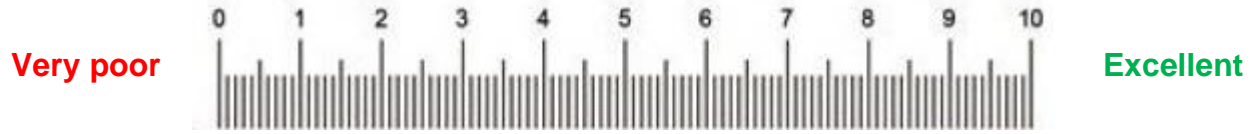

Below are complaints or problems related to a person’s physical functions that people with or without TSC may experience. Please indicate how much these complaints have troubled you during the last month. If any of the problems are always present, please include them in your estimation of your physical health in the past month.

Reply to each statement by ticking one box per row.

| <u>During the past month I was bothered by</u>                          | A lot | Somewhat | A little | Not at all |
|-------------------------------------------------------------------------|-------|----------|----------|------------|
| 1. difficulty sleeping                                                  |       |          |          |            |
| 2. fatigue                                                              |       |          |          |            |
| 3. dizziness                                                            |       |          |          |            |
| 4. problems with my weight (f.e. unexpected weight loss or weight gain) |       |          |          |            |
| 5. problems with my stomach (f.e. acid reflux, vomiting, nausea)        |       |          |          |            |
| 6. problem with stools (f.e. constipation or diarrhea)                  |       |          |          |            |

| <u>During the past month I was bothered by</u>                                                                                 | A lot | Somewhat | A little | Not at all |
|--------------------------------------------------------------------------------------------------------------------------------|-------|----------|----------|------------|
| 7. problems with my vision or eyes (f.e. difficulty seeing, squinting)                                                         |       |          |          |            |
| 8. speech and/or language problems (f.e. stuttering, others having difficulty understanding my speech, unintelligible speech ) |       |          |          |            |
| 9. problems with my balance (f.e. difficulty with stability when sitting, standing, or walking)                                |       |          |          |            |
| 10. problems with my motor skills (f.e. clumsiness, bad coordination)                                                          |       |          |          |            |

| <u>During the past month I was bothered by</u>                                              | A lot | Somewhat | A little | Not at all |
|---------------------------------------------------------------------------------------------|-------|----------|----------|------------|
| 11. skin abnormalities                                                                      |       |          |          |            |
| 12. inflammation ( <i>f.e. flu, respiratory infection, bladder infection, oral ulcers</i> ) |       |          |          |            |
| 13. epileptic insults ( <i>f.e. seizures, staring spells</i> )                              |       |          |          |            |
| 14. pain                                                                                    |       |          |          |            |
| 15. breathing problems ( <i>f.e. shortness of breath, wheezing, coughing</i> )              |       |          |          |            |
| 16. problems with my kidneys                                                                |       |          |          |            |
| 17. fluid retention ( <i>f.e. ankle edema</i> )                                             |       |          |          |            |
| 18. physical problems without a clear cause                                                 |       |          |          |            |

19. During last month I was bothered by side effects from my medication

- No
- Yes (please specify): -----  
-----  
-----  
-----

**Mental functions**

In general how was your mental health, including your mood and thinking facilities, during the last month?  
Please put a mark on the ruler below.

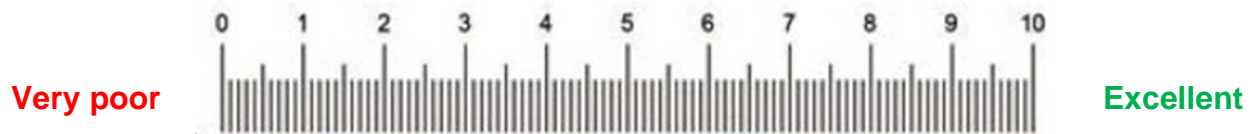

*Below are complaints or problems related to a person’s mental functions that people with or without TSC may experience. Please indicate how much these complaints have troubled you during the last month. If any of the problems are always present, please include them in your estimation of your mental health in the past month.*

Reply to each statement by ticking one box per row.

| <u>During the past month I experienced</u>                                                           | A lot | Somewhat | A little | Not at all |
|------------------------------------------------------------------------------------------------------|-------|----------|----------|------------|
| 1. overactive or hyperactive behavior                                                                |       |          |          |            |
| 2. restlessness ( <i>f.e. fidgeting or squirming</i> )                                               |       |          |          |            |
| 3. impulsivity ( <i>f.e. doing or saying things without thinking</i> )                               |       |          |          |            |
| 4. difficulty concentrating or keeping my attention ( <i>f.e. when reading or watching a movie</i> ) |       |          |          |            |
| 5. difficulty remembering things                                                                     |       |          |          |            |
| 6. difficulty with orientation in time or place ( <i>f.e. knowing the date, knowing where I am</i> ) |       |          |          |            |
| 7. problems with certain skills ( <i>f.e. arithmetic, reading, writing</i> )                         |       |          |          |            |

| <u>During the past month I experienced</u>                        | A lot | Somewhat | A little | Not at all |
|-------------------------------------------------------------------|-------|----------|----------|------------|
| 8. insecurity                                                     |       |          |          |            |
| 9. shyness                                                        |       |          |          |            |
| 10. difficulty making eye contact                                 |       |          |          |            |
| 11. difficulty relating to peers                                  |       |          |          |            |
| 12. difficulty identifying what someone was thinking or feeling   |       |          |          |            |
| 13. difficulty estimating my own abilities and limitations        |       |          |          |            |
| 14. difficulty to stand up for myself ( <i>f.e. saying 'no'</i> ) |       |          |          |            |
| 15. difficulty to accept myself as I am                           |       |          |          |            |

| <u>During the past month I experienced</u>                                                             | A lot | Some<br>what | A little | Not at<br>all |
|--------------------------------------------------------------------------------------------------------|-------|--------------|----------|---------------|
| 16. difficulty in meeting new people                                                                   |       |              |          |               |
| 17. difficulty with changes in routines                                                                |       |              |          |               |
| 18. hypersensitivity to sensory stimuli ( <i>f.e. being touched, bright light, busy surroundings</i> ) |       |              |          |               |
| 19. the need to repeatedly perform the same actions                                                    |       |              |          |               |
| 20. stubbornness                                                                                       |       |              |          |               |

| <u>During the past month I felt</u> | A lot | Some<br>what | A little | Not at<br>all |
|-------------------------------------|-------|--------------|----------|---------------|
| 21. unhappy, sad or depressed       |       |              |          |               |
| 22. nervous or stressed             |       |              |          |               |
| 23. anxious or scared               |       |              |          |               |
| 24. lonely                          |       |              |          |               |

| <u>During the past month I</u>                                               | A lot | Some<br>what | A little | Not at<br>all |
|------------------------------------------------------------------------------|-------|--------------|----------|---------------|
| 25. had mood swings                                                          |       |              |          |               |
| 26. had trouble handling stress                                              |       |              |          |               |
| 27. panicked easily                                                          |       |              |          |               |
| 28. worried a lot                                                            |       |              |          |               |
| 29. couldn't get specific thoughts out of my head                            |       |              |          |               |
| 30. had temper tantrums                                                      |       |              |          |               |
| 31. was verbally aggressive towards others ( <i>f.e. cursing, scolding</i> ) |       |              |          |               |

| <u>During the past month I worried about</u>                                             | A lot | Some<br>what | A little | Not at<br>all |
|------------------------------------------------------------------------------------------|-------|--------------|----------|---------------|
| 32. tumor growth                                                                         |       |              |          |               |
| 33. epilepsy                                                                             |       |              |          |               |
| 34. side effects of medication                                                           |       |              |          |               |
| 35. money ( <i>f.e. due to being unable to work or absences during hospital visits</i> ) |       |              |          |               |
| 36. my financial independence                                                            |       |              |          |               |
| 37. my social security ( <i>f.e. reimbursement of devices or care</i> )                  |       |              |          |               |



**Activities and participation**

During the past month, were you able to do your daily activities (with help as needed)?  
Please put a mark on the ruler below.

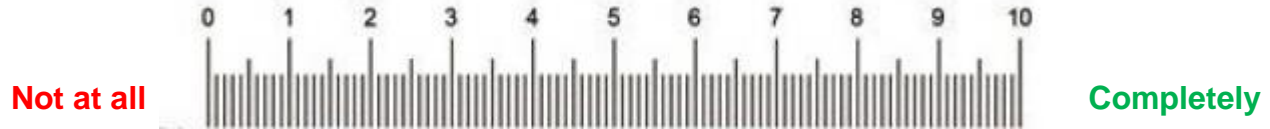

Below, activities are listed that occur in daily life for people with and without TSC. Please score how much you were hindered in performing these activities over the last month.

Reply to each statement by ticking one box per row.

| <u>During the past month I was limited in</u>               | Always | Often | Some-times | Never |
|-------------------------------------------------------------|--------|-------|------------|-------|
| 1. communicating with others                                |        |       |            |       |
| 2. learning something new                                   |        |       |            |       |
| 3. planning and organizing                                  |        |       |            |       |
| 4. remembering things                                       |        |       |            |       |
| 5. doing two things simultaneously ( <i>multi-tasking</i> ) |        |       |            |       |
| 6. getting along with people that I know well               |        |       |            |       |
| 7. building a relationship/making friends                   |        |       |            |       |

| <u>During the past month I was limited in</u>                                                               | Always | Often | Some-times | Never |
|-------------------------------------------------------------------------------------------------------------|--------|-------|------------|-------|
| 8. participating in sport/physical exercise                                                                 |        |       |            |       |
| 9. my financial independency                                                                                |        |       |            |       |
| 10. making my own choices ( <i>autonomy</i> )                                                               |        |       |            |       |
| 11. managing/planning my own free time                                                                      |        |       |            |       |
| 12. participating in daily activities, work or internship                                                   |        |       |            |       |
| 13. making use of transportation ( <i>f.e. driving a car, riding a bike, taking public transportation</i> ) |        |       |            |       |

**Social support**

In the past month, did you receive the kind of support that you needed?  
Please put a mark on the ruler below.

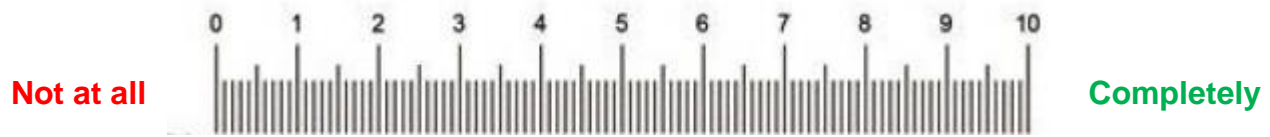

The following statements address how satisfied or dissatisfied you were with different aspects of your life in the past month.

Reply to each statement by ticking one box per row.

| <u>In the past month, I was satisfied with the support I received from</u>          | No, not at all | A little | Mostly | Completely | Not applicable |
|-------------------------------------------------------------------------------------|----------------|----------|--------|------------|----------------|
| 1. my family/partner                                                                |                |          |        |            |                |
| 2. my friends                                                                       |                |          |        |            |                |
| 3. patient support groups (patient organisation)                                    |                |          |        |            |                |
| 4. mental healthcare professionals (f.e. psychiatrist, psychologist, social worker) |                |          |        |            |                |
| 5. medical professionals (f.e. doctors, nurses)                                     |                |          |        |            |                |
| 6. non-medical professionals (f.e. caretakers)                                      |                |          |        |            |                |
| 7. from daycare activities, work or internship (f.e. employer or colleague)         |                |          |        |            |                |

| <u>In the past month, I was satisfied with</u> | No, not at all | A little | Mostly | Completely | Not applicable |
|------------------------------------------------|----------------|----------|--------|------------|----------------|
| 8. how my medication is working                |                |          |        |            |                |
| 9. the home where I live                       |                |          |        |            |                |
| 10. the availability of information about TSC  |                |          |        |            |                |
| 11. my social relationships                    |                |          |        |            |                |
| 12. my sex life                                |                |          |        |            |                |
| 13. my finances                                |                |          |        |            |                |

**Quality of life**

The last question asks about quality of life

How would you rate your quality of life over **the past month?**

Please put a mark on the ruler below.

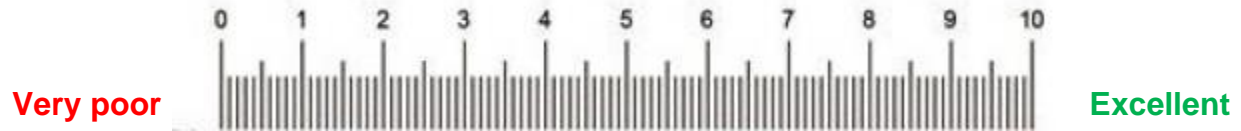

**This is the end of the questionnaire.**

## **TSC-PROM**

### **Questionnaire for adults with Tuberous Sclerosis Complex (TSC)**

## **Explanation and instructions**

### **What is this questionnaire about?**

You are filling in this questionnaire on behalf of your relative or client with Tuberous Sclerosis Complex. This questionnaire is about the complaints and limitations he/she experiences.

The questionnaire consists of the following domains:

- Baseline information
- Physical functions
- Mental functions
- Activities and participation
- Social support
- Quality of life

### **How to fill in this questionnaire?**

Read the instructions with every section carefully.

If possible, try and give the answer that you think your relative/client would give.

A statement may be for example: during the last month there was *'worrying or brooding'*. What matters is not if you were worried, but if your relative/client was worried.

Don't worry if some questions appear not to apply to your relative/client. We have to ask the same questions for everybody.

In the rest of the questionnaire we will call your relative/client 'the individual'.

### **Explanation and examples**

Some questions contain a short explanation. This explains the meaning of the mentioned term.

If f.e. (for example) is used, one or more examples follow. Possibly these examples are not applicable to you, but they may help you understand the question better.

### **Time**

Filling in the questionnaire will take approximately 20 min.

**Baseline information****1. What is the individual's sex?**

- Male
- Female
- Other

**2. What is the individual's age?**

-----years

**3. What is the individual's nationality?**

- American
- Other (please specify): -----

**4. What is your relationship to the individual?**

- Father
- Mother
- Brother
- Sister
- Caretaker
- Other (please specify): -----

**5. At what age was TSC diagnosed?**

-----years

**6. (a) Has genetic testing been performed?**

- I don't know (go to question 6)
- No (go to question 6)
- Yes

**(b) What were the results?**

- I don't know
- TSC1 mutation
- TSC2 mutation
- No mutation identified
- Mutations found but uncertain if they cause TSC

**7. Which organs show, or have shown, symptoms of TSC? For example: tubers, tumors, pigment changes**

- |                                              |                                  |
|----------------------------------------------|----------------------------------|
| <input type="checkbox"/> None                | <input type="checkbox"/> Brain   |
| <input type="checkbox"/> Skin                | <input type="checkbox"/> Kidneys |
| <input type="checkbox"/> Lungs               | <input type="checkbox"/> Eyes    |
| <input type="checkbox"/> Heart               | <input type="checkbox"/> Mouth   |
| <input type="checkbox"/> Other, namely ----- |                                  |

**8. Is the individual using medication?**

- No
- Yes (please list all medication) .....
- .....
- .....

**9. (a) Does the individual have epilepsy, now or in the past?**

- No (go to question 9)
- Yes

**(b) At what age did the first seizure occur?**

....years and ....months

- I don't know

**(c) How often do seizures occur?**

- Daily, approximately \_\_\_ per day
- Weekly, approximately \_\_\_ per week
- Monthly, approximately \_\_\_ per month
- The individual is seizure free, since \_\_\_ years old

**(d) Does the individual have a vagal nerve stimulator**

- No
- Yes

**(e) Is the individual on a ketogenic diet?**

- No
- Yes

**10. What is the (estimated) level of intellectual functioning of the individual?**

- Normal intellectual ability
- Normal intellectual ability with specific learning disability (dyscalculia, dyslexia)
- Mild or moderate intellectual disability
- Severe or profound intellectual disability
- I don't know

**11. What was the last measured IQ or developmental age of the individual?**

- The IQ was \_\_\_ measured on ..... (date or year)
- The developmental age was (approximately)..... measured on ..... (date or year)
- I don't know

**12. What is the highest level of education the individual completed?**

- None
- Preschool/kindergarten
- Primary education
- Primary education, special education program

- Lower secondary education (Middle school or Junior High)
- Secondary education, special education program
- Upper to post-secondary (Senior High school, 1-year certificate programs)
- Academic higher education or doctoral (Bachelor, Master, PhD)
- I don't know

**13. What is the current living situation of the individual?**

- Alone, without assistance
- With other people, without assistance
- Alone with ambulatory professional support
- With other people and with ambulatory professional support
- In an assisted living facility for people with a disability (no 24 hour care)
- In an assisted living facility for people with a disability (with 24 hour care)

**14. Has the individual ever been diagnosed with any of the following?**

|                                                           | No                       | Yes                      | I don't know             |
|-----------------------------------------------------------|--------------------------|--------------------------|--------------------------|
| Autism spectrum disorder (Autism, ASS, PDD-NOS, Asperger) | <input type="checkbox"/> | <input type="checkbox"/> | <input type="checkbox"/> |
| Attention deficit hyperactivity disorder (ADD, ADHD)      | <input type="checkbox"/> | <input type="checkbox"/> | <input type="checkbox"/> |
| Obsessive compulsive disorder (OCD)                       | <input type="checkbox"/> | <input type="checkbox"/> | <input type="checkbox"/> |
| Anxiety disorder                                          | <input type="checkbox"/> | <input type="checkbox"/> | <input type="checkbox"/> |
| Depressive disorder                                       | <input type="checkbox"/> | <input type="checkbox"/> | <input type="checkbox"/> |
| Psychotic disorder (f.e. schizophrenia)                   | <input type="checkbox"/> | <input type="checkbox"/> | <input type="checkbox"/> |
| Other diagnoses, namely .....                             |                          |                          |                          |

**15. (a) Does the individual has any other health concerns besides TSC?**

- No (go to question 15)
- Yes

**(b) What are these health concerns?**

- High blood pressure (hypertension)
- Diabetes ('sugar')
- Thyroid problems
- Malignant tumor (cancer)
- Other (please specify): .....

**16. (a) In the past year, has the individual experienced any major life events?**

- No (go to the next section)
- Yes

**(b) What kind of life events?**

- Moving house
- Change of employment / daytime occupation
- Severe illness or death of a relative or friend
- Another major life event, namely .....

**Physical functions**

In general, how was the physical health of the individual over the past month? Please put a mark on the ruler below.

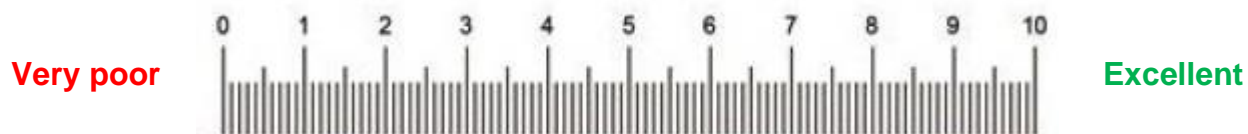

Below are complaints or problems related to a person's physical functions that people with or without TSC may experience. Please indicate how much these complaints have troubled the individual during the last month. If any of the problems are always present, please include them in your estimation of the physical health in the past month.

Reply to each statement by ticking one box per row.

| <u>During the past month the individual was bothered by</u>                             | A lot | Somewhat | A little | Not at all | I don't know |
|-----------------------------------------------------------------------------------------|-------|----------|----------|------------|--------------|
| 1. difficulty sleeping                                                                  |       |          |          |            |              |
| 2. fatigue                                                                              |       |          |          |            |              |
| 3. problems eating ( <i>f.e. eating too much or too little, eating unusual things</i> ) |       |          |          |            |              |
| 4. problems with his/her weight ( <i>f.e. unexpected weight loss or weight gain</i> )   |       |          |          |            |              |
| 5. problems with his/her stomach ( <i>f.e. acid reflux, vomiting, nausea</i> )          |       |          |          |            |              |
| 6. problem with his/her stool ( <i>f.e. constipation or diarrhea</i> )                  |       |          |          |            |              |

| <u>During the past month the individual was bothered by</u>                                                                                 | A lot | Somewhat | A little | Not at all | I don't know |
|---------------------------------------------------------------------------------------------------------------------------------------------|-------|----------|----------|------------|--------------|
| 7. problems with vision or eyes ( <i>f.e. difficulty seeing, squinting</i> )                                                                |       |          |          |            |              |
| 8. speech and/or language problems ( <i>f.e. stuttering, others having difficulty understanding his/her speech, unintelligible speech</i> ) |       |          |          |            |              |
| 9. problems with the equilibrium ( <i>f.e. balance problems, difficulty with stability when sitting, standing, walking</i> )                |       |          |          |            |              |
| 10. problems with motor skills ( <i>f.e. clumsiness, bad coordination</i> )                                                                 |       |          |          |            |              |



| <u>During the past month the individual was bothered by</u>                                  | A lot | Somewhat | A little | Not at all | I don't know |
|----------------------------------------------------------------------------------------------|-------|----------|----------|------------|--------------|
| 11. skin abnormalities                                                                       |       |          |          |            |              |
| 12. inflammation ( <i>f.e. flu, respiratory infection, bladder infection, mouth ulcers</i> ) |       |          |          |            |              |
| 13. epileptic insults ( <i>f.e. seizures, staring spells</i> )                               |       |          |          |            |              |
| 14. pain                                                                                     |       |          |          |            |              |
| 15. breathing problems ( <i>f.e. shortness of breath, wheezing, coughing</i> )               |       |          |          |            |              |
| 16. problems with the kidneys                                                                |       |          |          |            |              |
| 17. spasticity ( <i>high muscle tone</i> )                                                   |       |          |          |            |              |
| 18. fluid retention ( <i>f.e. ankle edema</i> )                                              |       |          |          |            |              |
| 19. physical problems without a clear cause                                                  |       |          |          |            |              |

20. During last month the individual was bothered by side effects from the medication

No

Yes (please specify): .....

.....

.....

.....

**Mental functions**

In general how was the mental health of the individual, including your mood and thinking facilities, during the last month?

Please put a mark on the ruler below.

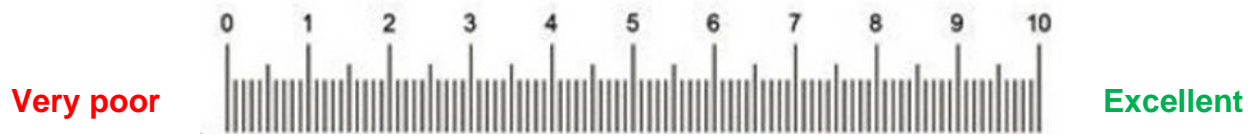

*Below are complaints or problems related to a person's mental functions that people with or without TSC may experience. Please indicate how much these complaints have troubled the individual during the last month. If any of the problems are always present, please include them in your estimation of the mental health in the past month.*

Reply to each statement by ticking one box per row.

| <u>During the past month the individual experienced</u>                                                   | A lot | Somewhat | A little | Not at all | I don' t know | Not applicable |
|-----------------------------------------------------------------------------------------------------------|-------|----------|----------|------------|---------------|----------------|
| 1. overactive or hyperactive behavior                                                                     |       |          |          |            |               |                |
| 2. restlessness ( <i>f.e. fidgeting or squirming</i> )                                                    |       |          |          |            |               |                |
| 3. impulsivity ( <i>f.e. doing or saying things without thinking</i> )                                    |       |          |          |            |               |                |
| 4. difficulty concentrating or keeping attention ( <i>f.e. when reading or watching a movie</i> )         |       |          |          |            |               |                |
| 5. difficulty remembering things                                                                          |       |          |          |            |               |                |
| 6. difficulty with orientation in time or place ( <i>f.e. knowing the date, knowing where he/she is</i> ) |       |          |          |            |               |                |

| <u>During the past month the individual experienced</u>                | A lot | Somewhat | A little | Not at all | I don' t know | Not applicable |
|------------------------------------------------------------------------|-------|----------|----------|------------|---------------|----------------|
| 7. insecurity                                                          |       |          |          |            |               |                |
| 8. difficulty making eye contact                                       |       |          |          |            |               |                |
| 9. difficulty relating to peers                                        |       |          |          |            |               |                |
| 10. difficulty identifying what someone was thinking or feeling        |       |          |          |            |               |                |
| 11. difficulty estimating his/her own abilities and limitations        |       |          |          |            |               |                |
| 12. difficulty to stand up for him/herself ( <i>f.e. saying 'no'</i> ) |       |          |          |            |               |                |

| <u>During the past month the individual experienced</u>                                                | A lot | Somewhat | A little | Not at all | I don' t know | Not applicable |
|--------------------------------------------------------------------------------------------------------|-------|----------|----------|------------|---------------|----------------|
| 13. difficulty meeting new people                                                                      |       |          |          |            |               |                |
| 14. difficulty with changes in routines                                                                |       |          |          |            |               |                |
| 15. hypersensitivity to sensory stimuli ( <i>f.e. being touched, bright light, busy surroundings</i> ) |       |          |          |            |               |                |
| 16. the need to repeatedly perform the same actions                                                    |       |          |          |            |               |                |
| 17. stubbornness                                                                                       |       |          |          |            |               |                |

| <u>During the past month the individual</u>                                                    | A lot | Somewhat | A little | Not at all | I don' t know | Not applicable |
|------------------------------------------------------------------------------------------------|-------|----------|----------|------------|---------------|----------------|
| 18. had moodswings                                                                             |       |          |          |            |               |                |
| 19. had trouble handling stress                                                                |       |          |          |            |               |                |
| 20. panicked easily                                                                            |       |          |          |            |               |                |
| 21. saw or heard things that other people did not see or hear ( <i>f.e. hallucinations</i> )   |       |          |          |            |               |                |
| 22. couldn't get specific thoughts out of his/her head                                         |       |          |          |            |               |                |
| 23. had temper tantrums                                                                        |       |          |          |            |               |                |
| 24. was physically aggressive towards others ( <i>f.e. throwing things, kicking, hitting</i> ) |       |          |          |            |               |                |
| 25. was verbally aggressive towards others ( <i>f.e. cursing, scolding</i> )                   |       |          |          |            |               |                |
| 26. tried to hurt him/herself                                                                  |       |          |          |            |               |                |

| <u>During the past month the individual worried about</u> | A lot | Somewhat | A little | Not at all | I don' t know | Not applicable |
|-----------------------------------------------------------|-------|----------|----------|------------|---------------|----------------|
| 27. epilepsy                                              |       |          |          |            |               |                |
| 28. side effects of medication                            |       |          |          |            |               |                |

**Activities and participation**

During the past month, was the individual able to do his/her daily activities (with help as needed)?  
Please put a mark on the ruler below.

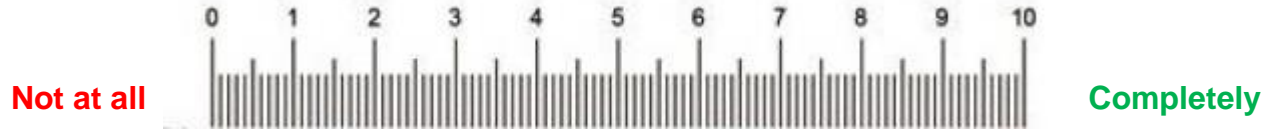

Below, activities are listed that occur in daily life for people with and without TSC. Please score how much the individual was hindered in performing these activities over the last month.

Reply to each statement by ticking one box per row.

| <u>During the past month the individual was limited in</u>  | Always | Often | Sometimes | Never | I don' t know | Not applicable |
|-------------------------------------------------------------|--------|-------|-----------|-------|---------------|----------------|
| 1. communicating with others                                |        |       |           |       |               |                |
| 2. learning something new                                   |        |       |           |       |               |                |
| 3. remembering things                                       |        |       |           |       |               |                |
| 4. doing two things simultaneously ( <i>multi-tasking</i> ) |        |       |           |       |               |                |
| 5. getting along with people that he/she knows well         |        |       |           |       |               |                |
| 6. getting along with strangers                             |        |       |           |       |               |                |
| 7. building a relationship/making friends                   |        |       |           |       |               |                |

| <u>During the past month the individual was limited in</u>      | Always | Often | Sometimes | Never | I don' t know | Not applicable |
|-----------------------------------------------------------------|--------|-------|-----------|-------|---------------|----------------|
| 8. washing and dressing him/herself                             |        |       |           |       |               |                |
| 9. walking independently                                        |        |       |           |       |               |                |
| 10. participating in sport/physical exercise                    |        |       |           |       |               |                |
| 11. caring for his/her health ( <i>f.e. taking medication</i> ) |        |       |           |       |               |                |
| 12. making his/her own choices ( <i>autonomy</i> )              |        |       |           |       |               |                |
| 13. managing/planning his/her own free time                     |        |       |           |       |               |                |
| 14. participating in daily activities, work or internship       |        |       |           |       |               |                |

**Social support**

In the experience of the individual, did he/she receive the needed support during the last month?

Please put a mark on the ruler below.

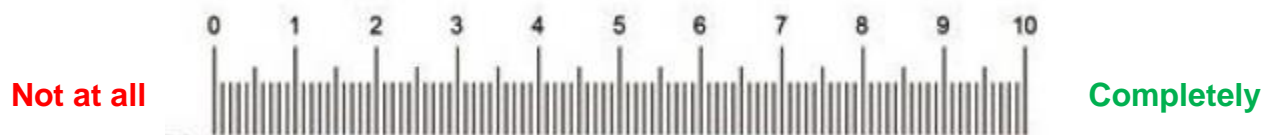

The following statements address how satisfied or dissatisfied the individual seems to be with different aspects of his/her life in the past month.

Reply to each statement by ticking one box per row.

| <u>In the past month, the individual seems to be satisfied with the support he/she received from</u> | No, not at all | A little | Mostly | Completely | I don't know | Not applicable |
|------------------------------------------------------------------------------------------------------|----------------|----------|--------|------------|--------------|----------------|
| 1. family/partner                                                                                    |                |          |        |            |              |                |
| 2. friends                                                                                           |                |          |        |            |              |                |
| 3. patient support groups (patient organisation)                                                     |                |          |        |            |              |                |
| 4. mental healthcare professionals (f.e. psychiatrist, psychologist, social worker)                  |                |          |        |            |              |                |
| 5. medical professionals (f.e. doctors, nurses)                                                      |                |          |        |            |              |                |
| 6. non-medical professionals (f.e. caretakers)                                                       |                |          |        |            |              |                |
| 7. from daycare activities, work or internship (f.e. employer or colleague)                          |                |          |        |            |              |                |

| <u>In the past month, the individual seems to be satisfied with</u> | No, not at all | A little | Mostly | Completely | I don't know | Not applicable |
|---------------------------------------------------------------------|----------------|----------|--------|------------|--------------|----------------|
| 8. how the medication is working                                    |                |          |        |            |              |                |
| 9. the home where he/she lives                                      |                |          |        |            |              |                |
| 10. the availability of information about TSC                       |                |          |        |            |              |                |
| 11. his/her social relationships                                    |                |          |        |            |              |                |
| 12. his/her sex life                                                |                |          |        |            |              |                |
| 13. his/her finances                                                |                |          |        |            |              |                |

**Quality of life**

The last question asks about quality of life

How do you think the individual would rate his/her quality of life over **the past month?**

Please put a mark on the ruler below.

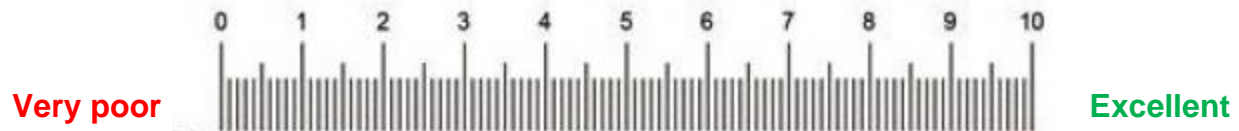

**This is the end of the questionnaire.**
