# Supplementary material for: Understanding the impact of tuberous sclerosis complex: development and validation of the TSC-PROM
Source: Springer Nature journal article supplement (doi:10.1186/s12916-023-03012-4), 2023-08-08
Supplement: MOESM3 [file 25900140]

## **TSC-PROM**

### **Vragenlijst voor volwassenen met Tubereuze Sclerose Complex (TSC)**

#### **Uitleg en instructies**

##### **Waar gaat de vragenlijst over?**

U vult deze vragenlijst in omdat u Tubereuze Sclerose Complex heeft.

De vragenlijst gaat over de klachten en beperkingen die u ervaart.

De vragenlijst bestaat uit de volgende delen:

- Basisinformatie
- Lichamelijk functioneren
- Geestelijk functioneren
- Activiteiten en participatie
- Sociale steun
- Kwaliteit van leven

##### **Hoe moet u de vragenlijst invullen?**

Lees de instructies bij elk onderdeel zorgvuldig.

Kies het antwoord dat het meest bij u past.

Maakt u zich geen zorgen als sommige vragen niet op u van toepassing zijn. We stellen iedereen dezelfde vragen.

##### **Toelichting en voorbeelden**

Bij sommige vragen staat een korte toelichting. Hierin leggen we uit wat we bedoelen met de genoemde term.

Als er 'bijv.' staat, volgen er één of meerdere voorbeelden. Mogelijk zijn deze voorbeelden niet op u van toepassing, maar helpen ze u de vraag beter te begrijpen.

##### **Tijdsduur**

Het invullen van de vragenlijst zal ongeveer 20 minuten duren.

**Basisinformatie**

**1. Wat is uw geslacht?**

- Man
- Vrouw
- Anders

**2. Wat is uw leeftijd?**

----- Jaar ----- maanden

**3. Wat is uw nationaliteit?**

- Nederlands
- Belgisch
- Anders, namelijk -----

**4. Op welke leeftijd werd de diagnose TSC gesteld?**

----- jaar

**5. (a) Is er genetisch onderzoek gedaan?**

- Weet niet (ga naar vraag 6)
- Nee (ga naar vraag 6)
- Ja

**(b) Wat was hiervan de uitslag?**

- Weet niet
- TSC1 mutatie
- TSC2 mutatie
- Geen afwijkingen gevonden
- Wel een mutatie gevonden, maar niet zeker of dit de ziekte veroorzaakt

**6. In welke organen zijn symptomen van TSC aanwezig, of aanwezig geweest?**

**Bijv. tubers, tumoren, pigmentafwijkingen**

- Geen  Hersenen
- Huid  Nieren
- Longen  Ogen
- Hart  Mond
- Overig, namelijk -----

**7. Gebruikt u medicatie?**

- Nee
- Ja, namelijk (graag alle huidige medicatie noteren) -----  
-----  
-----

**8. (a) Heeft u epilepsie (of in het verleden gehad)?**

- Nee (ga naar vraag 9)
- Ja

**(b) Op welke leeftijd had u uw eerste aanval?**

----- jaar en ----- maanden

**(c) Hoe vaak komen insulten voor?**

- Dagelijks, ongeveer ----- per dag
- Wekelijks, ongeveer ----- per week
- Maandelijks, ongeveer ----- per maand
- Jaarlijks, ongeveer ----- per jaar
- Ik ben aanvalsvrij, sinds de leeftijd van ----- jaar

**(d) Heeft u een nervus vagus stimulator?**

- Nee
- Ja

**(e) Volgt u een ketogeen dieet?**

- Nee
- Ja

**9. Wat is uw niveau van functioneren?**

- Normaal begaafd of bovengemiddeld begaafd
- Normaal begaafd met specifieke leerproblemen (zoals dyslexie of dyscalculie)
- Lichte of matige verstandelijke beperking

**10. Wat is uw laatst gemeten IQ of ontwikkelingsleeftijd (indien bekend)?**

- Het IQ was ----- gemeten op ----- (datum of jaartal)
- De ontwikkelingsleeftijd was (ongeveer) ----- gemeten op ----- (datum of jaartal)
- Weet niet

**11. Wat is uw hoogste afgeronde opleiding?**

Nederland

- Geen
- Basisschool/ Lagere school regulier onderwijs
- Basisschool/ Lagere school speciaal onderwijs
- Lager beroepsonderwijs (bijv. huishoudschool, LTS, LEAO, LHNO, praktijkonderwijs)
- Speciaal voortgezet onderwijs
- Middelbaar algemeen voortgezet onderwijs (bijv. MAVO, IVO, (M)ULO, VMBO)
- Middelbare beroepsopleiding (bijv. MBO 2-3, MTS, MEAO, MHNO, INAS)
- Hoger algemeen en voorbereidend wetenschappelijk onderwijs (bijv. HAVO, VWO, HBS, MMS, Gymnasium, Atheneum)

- Hoger beroepsonderwijs (bijv. HBO, HTS, HEAO, HHMO)
- Wetenschappelijk onderwijs (bijv. Bachelor, Master, Master na Master, doctoraat)

### België

- Geen
- Basisschool/ Lagere school regulier onderwijs
- Basisschool/ Lagere school buitengewoon onderwijs
- Lager secundair onderwijs (1<sup>ste</sup> graad SO)
- Buitengewoon secundair onderwijs
- Hoger secundair en post-secundair onderwijs (bijv. ASO, TSO, BSO)
- Professional bachelor/master
- Academic master of doctoraat

### 12. Waar woont u?

- Ik woon alleen, zonder begeleiding
- Ik woon met anderen, zonder begeleiding
- Ik woon alleen en krijg ambulante begeleiding
- Ik woon met anderen en krijg ambulante begeleiding
- Ik woon in een huis voor mensen met een beperking (géén 24-uurs zorg)
- Ik woon in een huis voor mensen met een beperking (24 uurs zorg)

### 13. Kreeg u, naast de diagnose TSC, ooit één of meerdere van onderstaande diagnoses?

|                                                             | Nee                      | Ja                       | Weet niet                |
|-------------------------------------------------------------|--------------------------|--------------------------|--------------------------|
| Autisme spectrum stoornis (Autisme, ASS, PDD-NOS, Asperger) | <input type="checkbox"/> | <input type="checkbox"/> | <input type="checkbox"/> |
| Aandachtstekort-hyperactiviteitstoornis (ADD, ADHD)         | <input type="checkbox"/> | <input type="checkbox"/> | <input type="checkbox"/> |
| Obsessieve-compulsieve stoornis (OCD)                       | <input type="checkbox"/> | <input type="checkbox"/> | <input type="checkbox"/> |
| Angststoornis                                               | <input type="checkbox"/> | <input type="checkbox"/> | <input type="checkbox"/> |
| Depressieve stoornis                                        | <input type="checkbox"/> | <input type="checkbox"/> | <input type="checkbox"/> |
| Psychotische stoornis (bijv. schizofrenie)                  | <input type="checkbox"/> | <input type="checkbox"/> | <input type="checkbox"/> |
| Andere diagnose(s), namelijk .....                          |                          |                          |                          |

### 14. (a) Heeft u, naast de diagnose TSC, nog andere gezondheidsproblemen?

- Nee (ga naar vraag 15)
- Ja

### (b) Welke gezondheidsproblemen heeft u?

- Hoge bloeddruk
- Suikerziekte (diabetes)
- Schildklieraandoening
- Kwaadaardige tumor (kanker)
- Anders, namelijk .....

**15. (a) Heeft u in het afgelopen jaar een ingrijpende gebeurtenis meegemaakt?**

- Nee (ga naar het volgende hoofdstuk)
- Ja

**(b) Wat voor ingrijpends heeft plaatsgevonden?**

- Verhuizing
- Verandering van werk
- Ernstige ziekte of overlijden van familie/kennis
- Een andere gebeurtenis, namelijk .....

**Lichamelijk functioneren**

Hoe vindt u over het algemeen uw lichamelijke gezondheid? Plaats een kruisje op de liniaal hieronder.

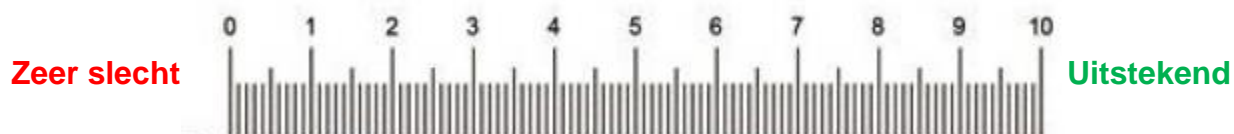

Hieronder volgen klachten of problemen op het gebied van het lichamelijk functioneren die mensen (met of zonder TSC) kunnen ervaren. Wilt u scoren hoeveel last u heeft gehad van deze klachten gedurende de afgelopen maand? Wanneer de klachten altijd aanwezig zijn, zijn deze dus ook van toepassing op de afgelopen maand.

Geef een reactie op elke uitspraak door per rij één hokje aan te vinken.

| <u>Gedurende de afgelopen maand had ik last van:</u>                | Heel erg | Nogal | Een beetje | Helemaal niet |
|---------------------------------------------------------------------|----------|-------|------------|---------------|
| 1. moeite met slapen                                                |          |       |            |               |
| 2. moeheid                                                          |          |       |            |               |
| 3. duizeligheid                                                     |          |       |            |               |
| 4. problemen met het gewicht (bijv. onbedoeld afvallen of aankomen) |          |       |            |               |
| 5. maagklachten (bijv. maagzuur, braken, misselijkheid)             |          |       |            |               |
| 6. problemen met de ontlasting (bijv. verstopping of diarree)       |          |       |            |               |

| <u>Gedurende de afgelopen maand had ik last van:</u>                                                    | Heel erg | Nogal | Een beetje | Helemaal niet |
|---------------------------------------------------------------------------------------------------------|----------|-------|------------|---------------|
| 7. problemen met zien of de ogen (bijv. niet goed kunnen zien, scheelzien)                              |          |       |            |               |
| 8. spraak- en/of taalproblemen (bijv. stotteren, moeilijk verstaanbaar zijn, moeite met woorden vinden) |          |       |            |               |
| 9. problemen met het evenwicht (bijv. balansproblemen, moeite met stabiel staan, lopen of zitten)       |          |       |            |               |
| 10. problemen van de motoriek (bijv. onhandigheid, slechte coördinatie, stijfheid)                      |          |       |            |               |

| <u>Gedurende de afgelopen maand had ik last van:</u>                                             | Heel erg | Nogal | Een beetje | Helemaal niet |
|--------------------------------------------------------------------------------------------------|----------|-------|------------|---------------|
| 11. huidafwijkingen                                                                              |          |       |            |               |
| 12. ontstekingen of infecties (bijv. griep, luchtweginfectie, blaasontsteking, aften in de mond) |          |       |            |               |
| 13. epileptische aanvallen (bijv. trekkingen, staaraanvallen)                                    |          |       |            |               |
| 14. pijn                                                                                         |          |       |            |               |
| 15. ademhalingsproblemen (bijv. kortademigheid, piepen, hoesten)                                 |          |       |            |               |
| 16. nierproblemen                                                                                |          |       |            |               |
| 17. vochtophoping (bijv. enkeloedeem)                                                            |          |       |            |               |
| 18. lichamelijke problemen zonder duidelijke oorzaak                                             |          |       |            |               |

19. Gedurende de afgelopen maand had ik last van bijwerkingen van de medicatie:

- Nee
- Ja, namelijk .....  
 .....  
 .....

**Geestelijk functioneren**

Hoe zou u over het algemeen uw geestelijke gezondheid, inclusief uw stemming en denkvermogen, beoordelen? Plaats een kruisje op de liniaal hieronder.

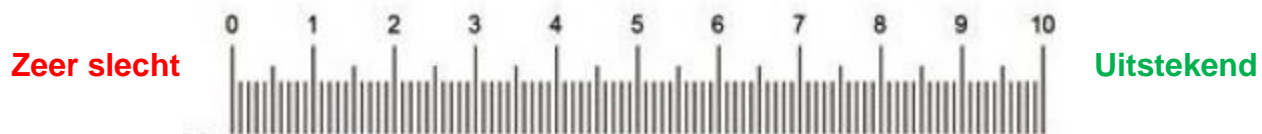

Hieronder volgen klachten of problemen op het gebied van het geestelijk functioneren die mensen (met of zonder TSC) kunnen ervaren. Wilt u scoren hoeveel last u heeft gehad van deze klachten gedurende de afgelopen maand? Wanneer de klachten altijd aanwezig zijn, zijn deze dus ook van toepassing op de afgelopen maand.

Geef een reactie op elke uitspraak door per rij één hokje aan te vinken.

| <u>Gedurende de afgelopen maand had ik:</u>                                                                | Heel erg | Nogal | Een beetje | Helemaal niet |
|------------------------------------------------------------------------------------------------------------|----------|-------|------------|---------------|
| 1. last van overactief of hyperactief gedrag                                                               |          |       |            |               |
| 2. last van rusteloos of plukkerig gedrag (bijv. wriemelen of wiebelen)                                    |          |       |            |               |
| 3. last van impulsief gedrag (bijv. dingen doen of zeggen zonder na te denken)                             |          |       |            |               |
| 4. moeite met concentreren of lang de aandacht bij iets te houden (bijv. tijdens lezen of een film kijken) |          |       |            |               |
| 5. moeite met het herinneren van dingen                                                                    |          |       |            |               |
| 6. moeite met het oriënteren in tijd en plaats (bijv. datum kennen, weten waar u bent)                     |          |       |            |               |
| 7. moeite met bepaalde vaardigheden (bijv. rekenen, lezen, schrijven)                                      |          |       |            |               |

| <u>Gedurende de afgelopen maand had ik:</u>                           | Heel erg | Nogal | Een beetje | Helemaal niet |
|-----------------------------------------------------------------------|----------|-------|------------|---------------|
| 8. last van onzekerheid                                               |          |       |            |               |
| 9. last van verlegenheid                                              |          |       |            |               |
| 10. moeite met oogcontact maken                                       |          |       |            |               |
| 11. moeite met leeftijdsgenoten om te gaan                            |          |       |            |               |
| 12. moeite met begrijpen wat iemand denkt of voelt                    |          |       |            |               |
| 13. moeite met mijn eigen mogelijkheden en beperkingen in te schatten |          |       |            |               |
| 14. moeite met voor mezelf opkomen (bijv. nee zeggen)                 |          |       |            |               |
| 15. moeite met mezelf te aanvaarden (zelfacceptatie)                  |          |       |            |               |



| <u>Gedurende de afgelopen maand had ik:</u>                                                              | Heel erg | Nogal | Een beetje | Helemaal niet |
|----------------------------------------------------------------------------------------------------------|----------|-------|------------|---------------|
| 16. moeite met nieuwe mensen ontmoeten                                                                   |          |       |            |               |
| 17. moeite met veranderen van routines                                                                   |          |       |            |               |
| 18. last van overgevoeligheid voor prikkels ( <i>bijv. aanrakingen, fel licht, een drukke omgeving</i> ) |          |       |            |               |
| 19. last van het willen herhalen van eenzelfde handeling                                                 |          |       |            |               |
| 20. last van koppigheid of stuursheid                                                                    |          |       |            |               |

| <u>Gedurende de afgelopen maand voelde ik me:</u> | Heel erg | Nogal | Een beetje | Helemaal niet |
|---------------------------------------------------|----------|-------|------------|---------------|
| 21. ongelukkig, verdrietig of gedeprimeerd        |          |       |            |               |
| 22. zenuwachtig of gespannen                      |          |       |            |               |
| 23. angstig of bang                               |          |       |            |               |
| 24. eenzaam                                       |          |       |            |               |

| <u>Gedurende de afgelopen maand:</u>                                         | Heel erg | Nogal | Een beetje | Helemaal niet |
|------------------------------------------------------------------------------|----------|-------|------------|---------------|
| 25. kon mijn stemming of gevoel plotseling veranderen                        |          |       |            |               |
| 26. vond ik het moeilijk om te gaan met stress                               |          |       |            |               |
| 27. raakte ik snel in paniek                                                 |          |       |            |               |
| 28. piekerde ik veel                                                         |          |       |            |               |
| 29. kon ik bepaalde gedachten moeilijk uit mijn hoofd zetten                 |          |       |            |               |
| 30. had ik driftbuien                                                        |          |       |            |               |
| 31. was ik verbaal agressief naar anderen ( <i>bijv. vloeken, schelden</i> ) |          |       |            |               |

| <u>Gedurende de afgelopen maand maakte ik me zorgen over:</u>                        | Heel erg | Nogal | Een beetje | Helemaal niet |
|--------------------------------------------------------------------------------------|----------|-------|------------|---------------|
| 32. tumorgroei                                                                       |          |       |            |               |
| 33. epilepsie                                                                        |          |       |            |               |
| 34. bijwerkingen van medicatie                                                       |          |       |            |               |
| 35. geld ( <i>door bijv. niet kunnen werken of verzuim door ziekenhuisbezoeken</i> ) |          |       |            |               |

|                                                                            |  |  |  |  |
|----------------------------------------------------------------------------|--|--|--|--|
| 36. mijn financiële zelfstandigheid                                        |  |  |  |  |
| 37. sociale zekerheid ( <i>bijv. vergoeding van hulpmiddelen of zorg</i> ) |  |  |  |  |

**Activiteiten en participatie**

Kon u in de afgelopen maand uw dagelijkse activiteiten ondernemen (eventueel met hulp)?

Plaats een kruisje op de liniaal hieronder.

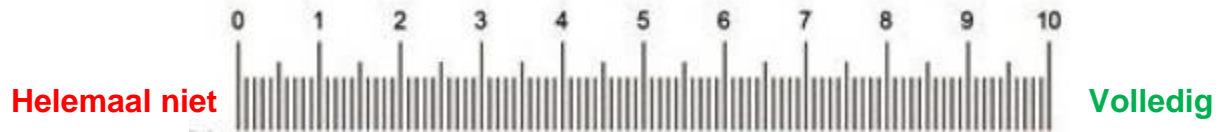

*Hieronder volgen activiteiten die plaatsvinden in het dagelijks leven van mensen met en zonder TSC. Wilt u scoren hoeveel belemmeringen u heeft ondervonden gedurende de afgelopen maand met het uitvoeren van deze activiteiten?*

Geef een reactie op elke uitspraak door per rij één hokje aan te vinken.

| <u>Gedurende de afgelopen maand was ik belemmerd in:</u> | Altijd | Vaak | Soms | Nooit |
|----------------------------------------------------------|--------|------|------|-------|
| 1. communicatie met anderen                              |        |      |      |       |
| 2. iets nieuws leren                                     |        |      |      |       |
| 3. dingen plannen en organiseren                         |        |      |      |       |
| 4. dingen onthouden                                      |        |      |      |       |
| 5. twee dingen tegelijkertijd doen (multi-tasking)       |        |      |      |       |
| 6. omgaan met mensen die ik goed ken                     |        |      |      |       |
| 7. een band opbouwen met iemand of vrienden maken        |        |      |      |       |

| <u>Gedurende de afgelopen maand was ik belemmerd in:</u>                   | Altijd | Vaak | Soms | Nooit |
|----------------------------------------------------------------------------|--------|------|------|-------|
| 8. sporten of aan lichaamsbeweging doen                                    |        |      |      |       |
| 9. mijn financiële zelfstandigheid                                         |        |      |      |       |
| 10. zelf te kunnen bepalen wat ik doe ( <i>autonomie</i> )                 |        |      |      |       |
| 11. mijn eigen vrije tijd plannen/indelen                                  |        |      |      |       |
| 12. deelname aan werk, stage of dagbesteding                               |        |      |      |       |
| 13. gebruikmaken van vervoermiddelen zoals auto, fiets of openbaar vervoer |        |      |      |       |

**Sociale steun**

Kreeg u in de afgelopen maand het soort steun dat u nodig had?

Plaats een kruisje op de liniaal hieronder.

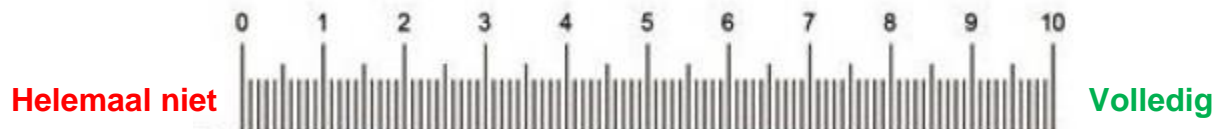

De volgende uitspraken gaan over hoe tevreden u in de afgelopen maand was met verschillende aspecten van uw leven.

Geef een reactie op elke uitspraak door per rij één hokje aan te vinken.

| <u>Ik was in de afgelopen maand tevreden over de steun die ik kreeg van:</u>                               | Helemaal niet | Enigszins | In grote mate | Volledig | Niet van toepassing |
|------------------------------------------------------------------------------------------------------------|---------------|-----------|---------------|----------|---------------------|
| 1. mijn familie/partner                                                                                    |               |           |               |          |                     |
| 2. mijn vrienden                                                                                           |               |           |               |          |                     |
| 3. de patiëntenvereniging                                                                                  |               |           |               |          |                     |
| 4. hulpverleners uit de Geestelijke Gezondheidszorg (bijv. psychiater, psycholoog, maatschappelijk werker) |               |           |               |          |                     |
| 5. medische hulpverleners (bijv. artsen en verpleegkundigen)                                               |               |           |               |          |                     |
| 6. niet-medische hulpverlening (bijv. begeleiders)                                                         |               |           |               |          |                     |
| 7. werk, stage of dagbesteding (bijv. collega of werkgever)                                                |               |           |               |          |                     |

| <u>Ik was in de afgelopen maand tevreden over:</u> | Helemaal niet | Enigszins | In grote mate | Volledig | Niet van toepassing |
|----------------------------------------------------|---------------|-----------|---------------|----------|---------------------|
| 8. de werking van mijn medicijnen                  |               |           |               |          |                     |
| 9. het huis waar ik woon                           |               |           |               |          |                     |
| 10. de beschikbaarheid van informatie over TSC     |               |           |               |          |                     |
| 11. mijn sociale relaties                          |               |           |               |          |                     |
| 12. mijn seksuele leven                            |               |           |               |          |                     |
| 13. mijn financiële middelen                       |               |           |               |          |                     |

**Kwaliteit van leven**

De laatste vraag gaat over kwaliteit van leven.

Hoe zou u uw kwaliteit van leven beoordelen **in de afgelopen maand?**

Plaats een kruisje op de liniaal hieronder.

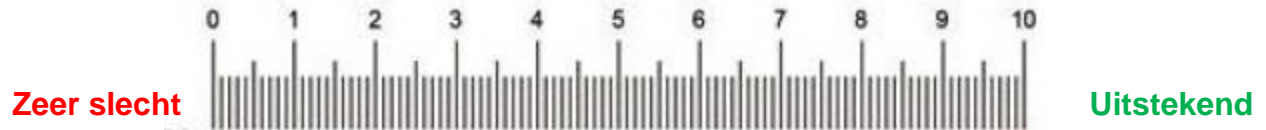

**Dit is het einde van de vragenlijst.**

## **TSC-PROM**

### **Vragenlijst voor volwassenen met Tubereuze Sclerose Complex (TSC)**

#### **Uitleg en instructies**

##### **Waar gaat de vragenlijst over?**

U vult deze vragenlijst in voor uw familielid of cliënt met Tubereuze Sclerose Complex.

De vragenlijst gaat over de klachten en beperkingen die hij/zij in het dagelijks leven ervaart.

De vragenlijst bestaat uit de volgende onderdelen:

- Basisinformatie
- Lichamelijk functioneren
- Geestelijk functioneren
- Activiteiten en participatie
- Sociale steun
- Kwaliteit van leven

##### **Hoe moet u de vragenlijst invullen?**

Lees de instructies bij elk onderdeel zorgvuldig.

Probeer het antwoord te geven waarvan u denkt dat uw familielid/cliënt zelf zou geven.

Een stelling kan bijvoorbeeld zijn: Gedurende de afgelopen maand was er sprake van *‘zich zorgen maken of piekeren’*. Het gaat er dan niet om of u zich zorgen maakte, maar of uw familielid/cliënt zich zorgen maakte.

Maakt u zich geen zorgen als sommige vragen niet op uw familielid/cliënt van toepassing zijn. We moeten iedereen dezelfde vragen stellen.

In de rest van de vragenlijst noemen we ‘uw familielid/cliënt’ steeds ‘betrokkene’.

##### **Toelichting en voorbeelden**

Bij sommige vragen staat een korte toelichting. Hierin leggen we uit wat we bedoelen met de genoemde term.

Als er ‘Bijv.’ staat, volgen er één of meerdere voorbeelden. Mogelijk zijn deze voorbeelden niet op betrokkene van toepassing, maar helpen ze u de vraag beter te begrijpen.

##### **Tijdsduur**

Het invullen van de vragenlijst zal ongeveer 20 minuten duren.

**Basisinformatie**

**1. Wat is het geslacht van betrokkene?**

- Man
- Vrouw
- Anders

**2. Wat is de leeftijd van betrokkene?**

----- jaar

**3. Wat is de nationaliteit van betrokkene?**

- Nederlands
- Belgisch
- Anders, namelijk ...

**4. Wat is uw relatie tot de betrokkene?**

- Vader
- Moeder
- Broer
- Zus
- (Persoonlijk) begeleider
- Anders, namelijk -----

**5. Op welke leeftijd werd de diagnose TSC gesteld?**

----- Jaar

**6. (a) Is er genetisch onderzoek gedaan bij betrokkene?**

- Weet niet (ga naar vraag 7)
- Nee (ga naar vraag 7)
- Ja

**(b) Wat was hiervan de uitslag?**

- Weet niet
- TSC1 mutatie
- TSC2 mutatie
- Geen afwijkingen gevonden
- Wel een mutatie gevonden, maar niet zeker of dit de ziekte veroorzaakt

**7. In welke organen zijn symptomen van TSC aanwezig, of aanwezig geweest?**

**Bijv. tubers, tumoren, pigmentafwijkingen**

- Geen
- Hersenen
- Huid
- Nieren
- Longen
- Ogen
- Hart
- Mond
- Overig, namelijk -----

**8. Gebruikt betrokkene medicatie?**

- Nee
- Ja, namelijk (graag alle huidige medicatie noteren) -----  
-----  
-----

**9. (a) Heeft betrokkene epilepsie (of in het verleden gehad)?**

- Nee
- Ja

**(b) Op welke leeftijd had betrokkene de eerste aanval?**

\_\_\_\_\_ jaar en \_\_\_\_\_ maanden

- Weet niet

**(c) Hoe vaak komen insulten voor?**

- Dagelijks, ongeveer \_\_\_\_\_ per dag
- Wekelijks, ongeveer \_\_\_\_\_ per week
- Maandelijks, ongeveer \_\_\_\_\_ per maand
- Jaarlijks, ongeveer \_\_\_\_\_ per jaar
- Betrokkene is aanvalsvrij, sinds de leeftijd van \_\_\_\_\_ jaar

**(d) Heeft betrokkene een nervus vagus stimulator?**

- Nee
- Ja

**(e) Volgt betrokkene een ketogeen dieet?**

- Nee
- Ja

**10. Hoe zou u het functioneren van betrokkene inschatten?**

- Normaal begaafd of bovengemiddeld begaafd
- Normaal begaafd met specifieke leerproblemen (zoals dyslexie of dyscalculie)
- Milde of matige verstandelijke beperking
- Ernstige of diepe verstandelijke beperking

**11. Wat is het laatst gemeten IQ of de ontwikkelingsleeftijd (indien bekend) van betrokkene?**

- Het IQ was \_\_\_\_\_ gemeten op \_\_\_\_\_ (datum of jaartal)
- De ontwikkelingsleeftijd was \_\_\_\_\_ gemeten op \_\_\_\_\_ (datum of jaartal)
- Weet niet



**12. Wat is de hoogste afgeronde opleiding van betrokkene?**Nederland

- Geen
- Basisschool/ Lagere school regulier onderwijs
- Basisschool/ Lagere school speciaal onderwijs
- Lager beroepsonderwijs (bijv. huishoudschool, LTS, LEAO, LHNO, praktijkonderwijs)
- Speciaal voortgezet onderwijs
- Middelbaar algemeen voortgezet onderwijs (bijv. MAVO, IVO, (M)ULO, VMBO)
- Middelbare beroepsopleiding (bijv. MBO 2-3, MTS, MEAO, MHNO, INAS)
- Hoger algemeen en voorbereidend wetenschappelijk onderwijs (bijv. HAVO, VWO, HBS, MMS, Gymnasium, Atheneum)
- Hoger beroepsonderwijs (bv. HBO, HTS, HEAO, HHMO)
- Wetenschappelijk onderwijs (WO)

België

- Geen
- Basisschool/ Lagere school regulier onderwijs
- Basisschool/ Lagere school buitengewoon onderwijs
- Lager secundair onderwijs (1<sup>ste</sup> graad SO)
- Buitengewoon secundair onderwijs
- Hoger secundair en post-secundair onderwijs (ASO, TSO, BSO)
- Professional Bachelor/Master
- Academic Master

**13. Waar woont betrokkene?**

- Alleen, zonder begeleiding
- Met anderen, zonder begeleiding
- Alleen, met ambulante begeleiding
- Met anderen, met ambulante begeleiding
- In een huis voor mensen met een beperking (géén 24-uurs zorg)
- In een huis voor mensen met een beperking (24 uren zorg)

**14. Kreeg betrokkene ooit één of meerdere van onderstaande diagnoses?**

|                                                             | <b>Nee</b>               | <b>Ja</b>                | <b>Weet niet</b>         |
|-------------------------------------------------------------|--------------------------|--------------------------|--------------------------|
| Autisme spectrum stoornis (Autisme, ASS, PDD-NOS, Asperger) | <input type="checkbox"/> | <input type="checkbox"/> | <input type="checkbox"/> |
| Aandachtstekort-hyperactiviteitstoornis (ADD, ADHD)         | <input type="checkbox"/> | <input type="checkbox"/> | <input type="checkbox"/> |
| Obsessieve-compulsieve stoornis (OCD)                       | <input type="checkbox"/> | <input type="checkbox"/> | <input type="checkbox"/> |
| Angststoornis                                               | <input type="checkbox"/> | <input type="checkbox"/> | <input type="checkbox"/> |
| Depressieve stoornis                                        | <input type="checkbox"/> | <input type="checkbox"/> | <input type="checkbox"/> |
| Psychotische stoornis (bijv. schizofrenie)                  | <input type="checkbox"/> | <input type="checkbox"/> | <input type="checkbox"/> |
| Andere diagnose(s), namelijk _____                          |                          |                          |                          |

**15. (a) Heeft betrokkene, naast de diagnose TSC, nog andere gezondheidsproblemen?**

- Nee (ga naar vraag 16)
- Ja

**(b) Welke gezondheidsproblemen heeft betrokkene?**

- Hoge bloeddruk
- Suikerziekte (diabetes)
- Schildklierandoening
- Kwaadaardige tumor
- Anders, namelijk .....

**16. (a) Heeft betrokkene in het afgelopen jaar een ingrijpende gebeurtenis meegemaakt?**

- Nee (ga naar het volgende hoofdstuk)
- Ja

**(b) Wat voor ingrijpends heeft plaatsgevonden?**

- Verhuizing
- Verandering van werk of dagbesteding
- Verandering in begeleiding
- Problemen met medebewoner of zorg
- Ernstige ziekte of overlijden van familie/kennis
- Een andere gebeurtenis, namelijk .....

**Lichamelijk functioneren**

Hoe was de lichamelijke gezondheid van betrokkene in de afgelopen maand?

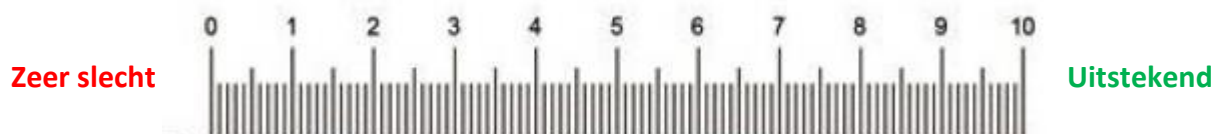

Hieronder volgen klachten of problemen op het gebied van het lichamelijk functioneren die mensen (met of zonder TSC) kunnen ervaren. Wilt u scoren hoeveel last betrokkene heeft gehad van deze klachten gedurende de afgelopen maand? Wanneer de klachten altijd aanwezig zijn, zijn deze dus ook van toepassing op de afgelopen maand.

Geef een reactie op elke uitspraak door per rij één hokje aan te vinken.

| <u>Gedurende de afgelopen maand had betrokkene last van:</u>                 | Heel erg | Nogal | Een beetje | Helemaal niet | Weet niet |
|------------------------------------------------------------------------------|----------|-------|------------|---------------|-----------|
| 1. moeite met slapen                                                         |          |       |            |               |           |
| 2. moeheid                                                                   |          |       |            |               |           |
| 3. problemen met eten (bijv. teveel of te weinig eten, ongewone dingen eten) |          |       |            |               |           |
| 4. problemen met het gewicht (bijv. onbedoeld afvallen of aankomen)          |          |       |            |               |           |
| 5. maagklachten (bijv. maagzuur, braken, misselijkheid)                      |          |       |            |               |           |
| 6. problemen met de ontlasting (bijv. verstopping of diarree)                |          |       |            |               |           |

| <u>Gedurende de afgelopen maand had betrokkene last van:</u>                                            | Heel erg | Nogal | Een beetje | Helemaal niet | Weet niet |
|---------------------------------------------------------------------------------------------------------|----------|-------|------------|---------------|-----------|
| 7. problemen met zien of de ogen (bijv. niet goed kunnen zien, scheelzien)                              |          |       |            |               |           |
| 8. spraak- en/of taalproblemen (bijv. stotteren, moeilijk verstaanbaar zijn, moeite met woorden vinden) |          |       |            |               |           |
| 9. problemen met het evenwicht (bijv. balansproblemen, moeite met stabiel staan, lopen of zitten)       |          |       |            |               |           |
| 10. problemen van de motoriek (bijv. onhandigheid, slechte coördinatie, stijfheid)                      |          |       |            |               |           |

| <u>Gedurende de afgelopen maand had betrokkene last van:</u>                                              | Heel erg | Nogal | Een beetje | Helemaal niet | Weet niet |
|-----------------------------------------------------------------------------------------------------------|----------|-------|------------|---------------|-----------|
| 11. huidafwijkingen                                                                                       |          |       |            |               |           |
| 12. ontstekingen of infecties ( <i>bijv. griep, luchtweginfectie, blaasontsteking, aften in de mond</i> ) |          |       |            |               |           |
| 13. epileptische aanvallen ( <i>bijv. trekkingen, staaraanvallen</i> )                                    |          |       |            |               |           |
| 14. pijn                                                                                                  |          |       |            |               |           |
| 15. ademhalingsproblemen ( <i>bijv. kortademigheid, piepen, hoesten</i> )                                 |          |       |            |               |           |
| 16. nierproblemen                                                                                         |          |       |            |               |           |
| 17. spasticiteit ( <i>verhoogde spierspanning</i> )                                                       |          |       |            |               |           |
| 18. vochtophoping ( <i>bijv. enkeloedeem</i> )                                                            |          |       |            |               |           |
| 19. lichamelijke problemen zonder duidelijke oorzaak                                                      |          |       |            |               |           |

20. Had betrokkene gedurende de afgelopen maand last van bijwerkingen van de medicatie:

- Nee
- Ja, namelijk\_-----

**Geestelijk functioneren**

Hoe was over het algemeen de geestelijke gezondheid van betrokkene in de afgelopen maand?

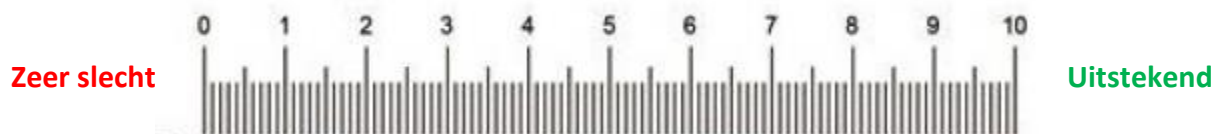

Hieronder volgen klachten of problemen op het gebied van het geestelijk functioneren die mensen (met of zonder TSC) kunnen ervaren. Wilt u scoren hoeveel last betrokkene heeft gehad van deze klachten gedurende de afgelopen maand? Wanneer de klachten altijd aanwezig zijn, zijn deze dus ook van toepassing op de afgelopen maand.

Geef een reactie op elke uitspraak door per rij één hokje aan te vinken.

|                                                                                                            | Heel erg | Nogal | Een beetje | Helemaal niet | Weet niet | Niet van toepassing |
|------------------------------------------------------------------------------------------------------------|----------|-------|------------|---------------|-----------|---------------------|
| <u>Gedurende de afgelopen maand had betrokkene:</u>                                                        |          |       |            |               |           |                     |
| 1. last van overactief of hyperactief gedrag                                                               |          |       |            |               |           |                     |
| 2. last van rusteloos of plukkerig gedrag (bijv. wriemelen of wiebelen)                                    |          |       |            |               |           |                     |
| 3. last van impulsief gedrag (bijv. dingen doen of zeggen zonder na te denken)                             |          |       |            |               |           |                     |
| 4. moeite met concentreren of lang de aandacht bij iets te houden (bijv. tijdens lezen of een film kijken) |          |       |            |               |           |                     |
| 5. moeite met het herinneren van dingen                                                                    |          |       |            |               |           |                     |
| 6. moeite met het oriënteren in tijd en plaats (bijv. datum kennen, weten waar hij/zij is)                 |          |       |            |               |           |                     |

|                                                                            | Heel erg | Nogal | Een beetje | Helemaal niet | Weet niet | Niet van toepassing |
|----------------------------------------------------------------------------|----------|-------|------------|---------------|-----------|---------------------|
| <u>Gedurende de afgelopen maand had betrokkene:</u>                        |          |       |            |               |           |                     |
| 7. last van onzekerheid                                                    |          |       |            |               |           |                     |
| 8. moeite met oogcontact maken                                             |          |       |            |               |           |                     |
| 9. moeite met leeftijdsgenoten om te gaan                                  |          |       |            |               |           |                     |
| 10. moeite met begrijpen wat iemand denkt of voelt                         |          |       |            |               |           |                     |
| 11. moeite met zijn/haar eigen mogelijkheden en beperkingen in te schatten |          |       |            |               |           |                     |
| 12. moeite met voor zichzelf opkomen (bijv. nee zeggen)                    |          |       |            |               |           |                     |

|                                                                                                          | Heel erg | Nogal | Een beetje | Helemaal niet | Weet niet | Niet van toepassing |
|----------------------------------------------------------------------------------------------------------|----------|-------|------------|---------------|-----------|---------------------|
| <u>Gedurende de afgelopen maand had betrokkene:</u>                                                      |          |       |            |               |           |                     |
| 13. moeite met nieuwe mensen ontmoeten                                                                   |          |       |            |               |           |                     |
| 14. moeite met veranderen van routines                                                                   |          |       |            |               |           |                     |
| 15. last van overgevoeligheid voor prikkels ( <i>bijv. aanrakingen, fel licht, een drukke omgeving</i> ) |          |       |            |               |           |                     |
| 16. last van het willen herhalen van eenzelfde handeling                                                 |          |       |            |               |           |                     |
| 17. last van koppigheid of stuursheid                                                                    |          |       |            |               |           |                     |

|                                                                                                      | Heel erg | Nogal | Een beetje | Helemaal niet | Weet niet | Niet van toepassing |
|------------------------------------------------------------------------------------------------------|----------|-------|------------|---------------|-----------|---------------------|
| <u>Gedurende de afgelopen maand:</u>                                                                 |          |       |            |               |           |                     |
| 18. had betrokkene stemmingswisselingen                                                              |          |       |            |               |           |                     |
| 19. kon betrokkene moeilijk omgaan met stress                                                        |          |       |            |               |           |                     |
| 20. raakte betrokkene snel in paniek                                                                 |          |       |            |               |           |                     |
| 21. zag of hoorde betrokkene dingen die anderen niet zagen ( <i>bijv. hallucinaties</i> )            |          |       |            |               |           |                     |
| 22. kon betrokkene bepaalde gedachten moeilijk uit zijn/haar hoofd zetten                            |          |       |            |               |           |                     |
| 23. had betrokkene driftbuien                                                                        |          |       |            |               |           |                     |
| 24. was betrokkene lichamelijk agressief naar anderen ( <i>bijv. dingen gooien, schoppen slaan</i> ) |          |       |            |               |           |                     |
| 25. was betrokkene verbaal agressief naar anderen ( <i>bijv. vloeken, schelden</i> )                 |          |       |            |               |           |                     |
| 26. probeerde betrokkene zichzelf te verwonden                                                       |          |       |            |               |           |                     |

|                                                                         | Heel erg | Nogal | Een beetje | Helemaal niet | Weet niet | Niet van toepassing |
|-------------------------------------------------------------------------|----------|-------|------------|---------------|-----------|---------------------|
| <u>Gedurende de afgelopen maand maakte betrokkene zich zorgen over:</u> |          |       |            |               |           |                     |
| 27. epilepsie                                                           |          |       |            |               |           |                     |
| 28. bijwerkingen van medicatie                                          |          |       |            |               |           |                     |

**Activiteiten en participatie**

Kon betrokkene zijn/haar dagelijkse activiteiten ondernemen? (eventueel met hulp)

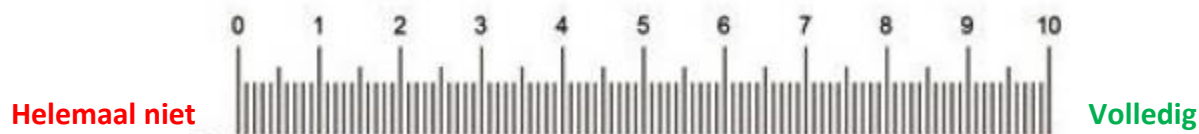

Hieronder volgen activiteiten die plaatsvinden in het dagelijks leven van mensen met en zonder TSC.

Wilt u scoren hoeveel hinder betrokkene heeft ondervonden gedurende de afgelopen maand in het uitvoeren van deze activiteiten?

Geef een reactie op elke uitspraak door per rij één hokje aan te vinken.

| <u>Gedurende de afgelopen maand was betrokkene belemmerd in:</u> | Altijd | Vaak | Soms | Nooit | Weet niet | Niet van toepassing |
|------------------------------------------------------------------|--------|------|------|-------|-----------|---------------------|
| 1. communicatie met anderen                                      |        |      |      |       |           |                     |
| 2. iets nieuws leren                                             |        |      |      |       |           |                     |
| 3. dingen onthouden                                              |        |      |      |       |           |                     |
| 4. twee dingen tegelijkertijd doen (multi-tasking)               |        |      |      |       |           |                     |
| 5. omgaan met mensen die hij/zij goed kent                       |        |      |      |       |           |                     |
| 6. omgaan met onbekenden                                         |        |      |      |       |           |                     |
| 7. een band opbouwen met iemand of vrienden maken                |        |      |      |       |           |                     |

| <u>Gedurende de afgelopen maand was betrokkene belemmerd in:</u>     | Altijd | Vaak | Soms | Nooit | Weet niet | Niet van toepassing |
|----------------------------------------------------------------------|--------|------|------|-------|-----------|---------------------|
| 8. zichzelf wassen en aankleden                                      |        |      |      |       |           |                     |
| 9. zelfstandig lopen                                                 |        |      |      |       |           |                     |
| 10. sporten of aan lichaamsbeweging doen                             |        |      |      |       |           |                     |
| 11. zorgen voor zijn/haar eigen gezondheid (bijv. medicatie innemen) |        |      |      |       |           |                     |
| 12. zelf te kunnen bepalen wat hij/zij doet (autonomie)              |        |      |      |       |           |                     |
| 13. zijn/haar eigen vrije tijd plannen/indelen                       |        |      |      |       |           |                     |
| 14. deelname aan dagbesteding, stage of werk                         |        |      |      |       |           |                     |

**Sociale steun**

Kreeg betrokkene in de afgelopen maand het soort steun dat hij/zij nodig had?

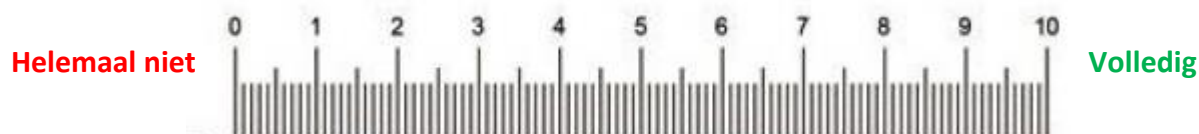

In de volgende vragen wordt gevraagd naar hoe tevreden betrokkene was, of leek te zijn, met de verschillende aspecten van zijn/haar leven.

Geef een reactie op elke uitspraak door per rij één hokje aan te vinken

| <u>Betrokkene was in de afgelopen maand tevreden over de steun van:</u>                                    | Helemaal niet | Enigszins | In grote mate | Volledig | Weet niet | Niet van toepassing |
|------------------------------------------------------------------------------------------------------------|---------------|-----------|---------------|----------|-----------|---------------------|
| 1. familie/partner                                                                                         |               |           |               |          |           |                     |
| 2. vrienden                                                                                                |               |           |               |          |           |                     |
| 3. de patiëntenvereniging                                                                                  |               |           |               |          |           |                     |
| 4. hulpverleners uit de Geestelijke Gezondheidszorg (bijv. psychiater, psycholoog, maatschappelijk werker) |               |           |               |          |           |                     |
| 5. medische hulpverleners (bijv. artsen en verpleegkundigen)                                               |               |           |               |          |           |                     |
| 6. niet-medische hulpverlening (bijv. begeleiders)                                                         |               |           |               |          |           |                     |
| 7. dagbesteding, werk of stage (bijv. collega of werkgever)                                                |               |           |               |          |           |                     |

| <u>Betrokkene was in de afgelopen maand tevreden over:</u> | Helemaal niet | Enigszins | In grote mate | Volledig | Weet niet | Niet van toepassing |
|------------------------------------------------------------|---------------|-----------|---------------|----------|-----------|---------------------|
| 8. de werking van de medicijnen                            |               |           |               |          |           |                     |
| 9. het huis waar hij/zij woont                             |               |           |               |          |           |                     |
| 10. de beschikbaarheid van informatie over TSC             |               |           |               |          |           |                     |
| 11. zijn/haar sociale relaties                             |               |           |               |          |           |                     |
| 12. zijn/haar seksuele leven                               |               |           |               |          |           |                     |
| 13. zijn/haar financiële middelen                          |               |           |               |          |           |                     |



**Kwaliteit van leven**

De laatste vraag gaat over kwaliteit van leven.

Hoe zou betrokkene zijn kwaliteit van leven in **de afgelopen maand** inschatten?

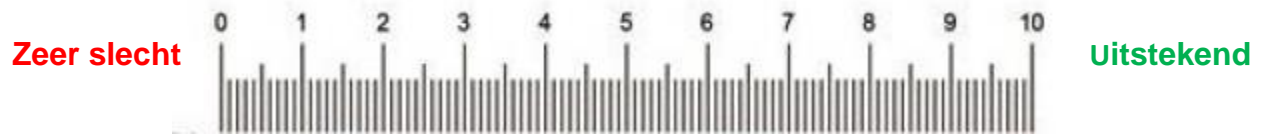

**Dit is het einde van de vragenlijst.**
